# Supplementary material
Source: ML conference proceedings conference paper supplement (https://openreview.net/forum?id=3z60EWfh1p)

Loss Curves without Consistent Loss

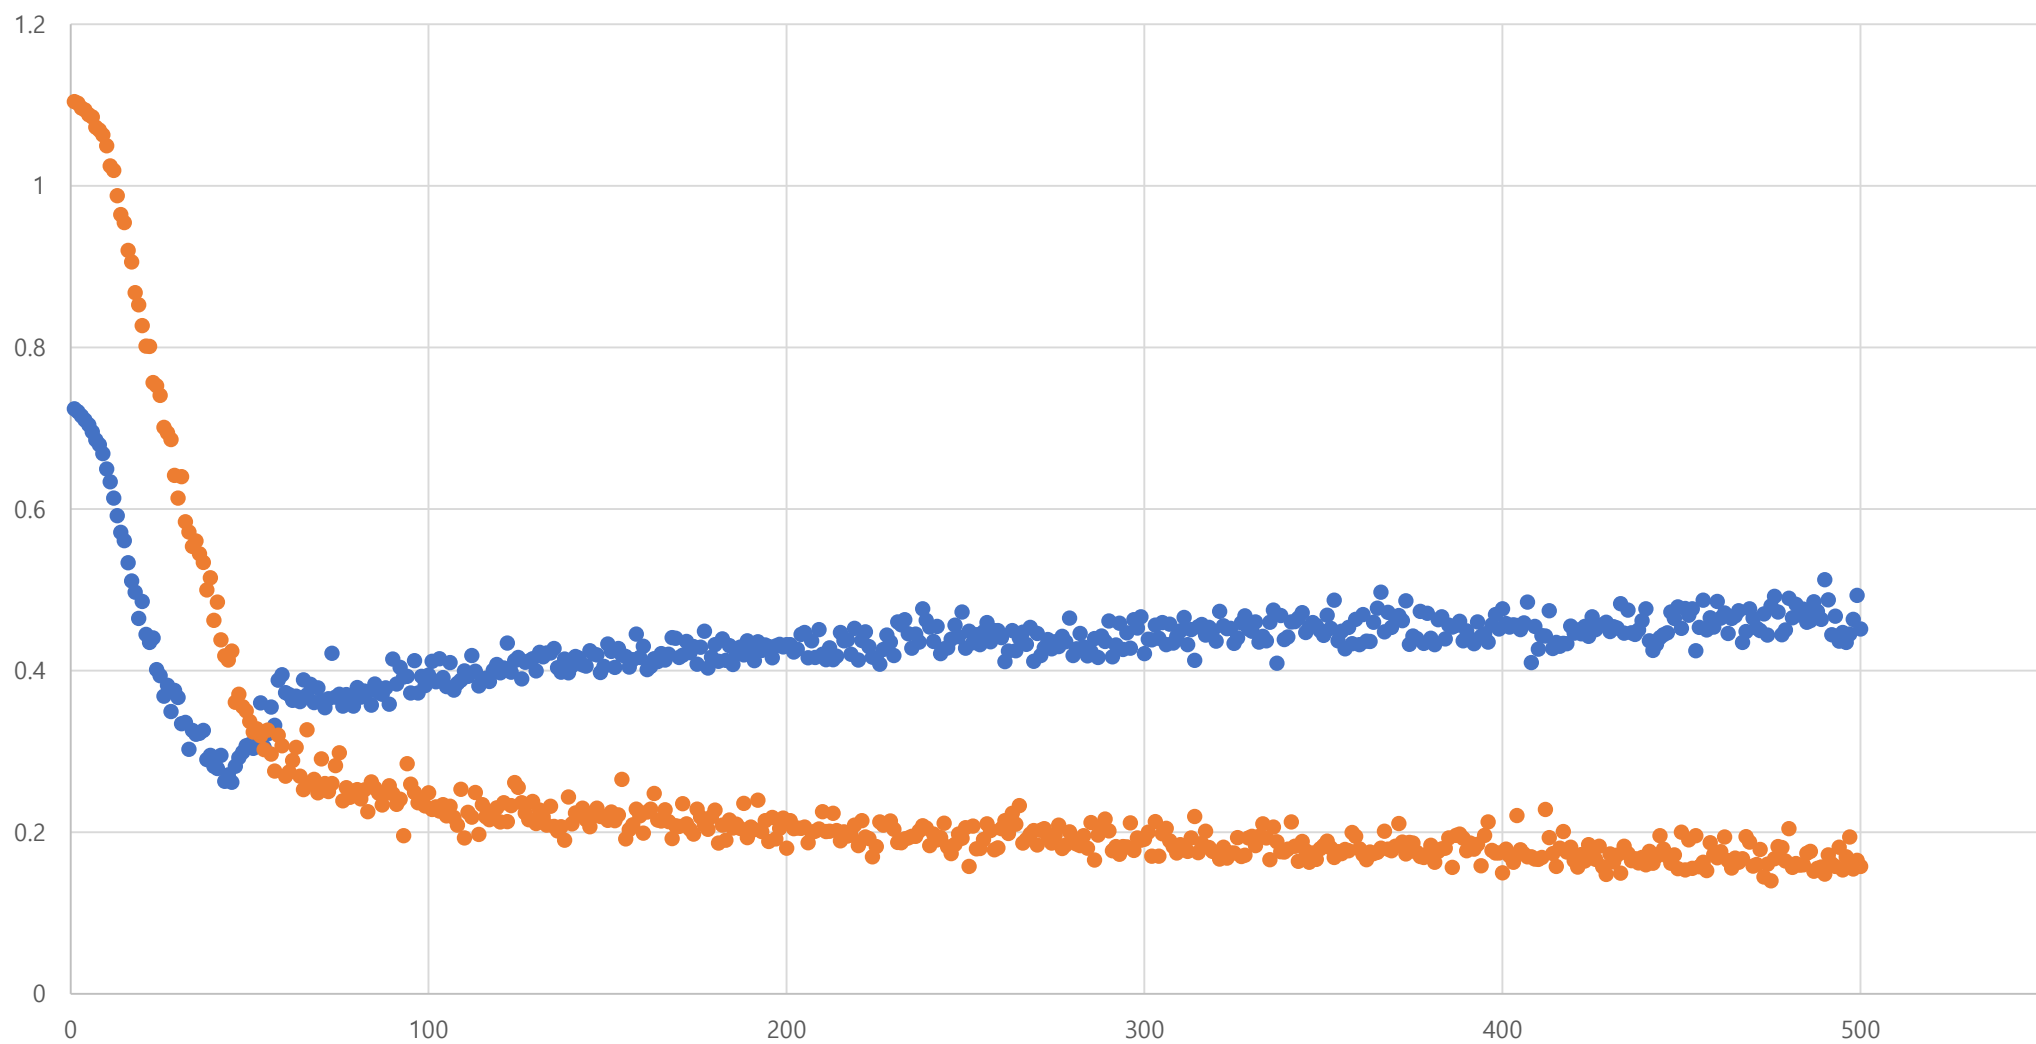

Supplement: supplementary_material [file attachment]
